# Supplementary material
Source: HighWire-hosted journal article supplement (https://bmjopen.bmj.com/content/11/12/e053674)
Supplement: inline-supplementary-material-2 [file inline-supplementary-material-2.pdf]

## Online Supplementary file 2 – Search strategy

Keyword searches conducted in the databases *PubMed*, *EMBASE* and *Web of Science* as part of the scoping review.

### 1) PubMed Query

Search: (((("Machine learning" OR "statistical learning" OR "supervised learning" OR "unsupervised learning")) OR ("Machine Learning"[Mesh]) AND ("Biomarkers"[Mesh]) OR "Precision Medicine"[Mesh]) AND (((Omic\* OR "omic based" OR "multi omic" OR "multi omics" OR genomic\* OR transcriptomic\* OR proteomic\* OR metabolomic\* OR lipidomic\* OR epigenomic\* OR microarray OR "RNA seq" OR "mass spectrometry")) OR ("Genomics"[Mesh] OR "Metabolomics"[Mesh] OR "Epigenomics"[Mesh] OR "Microarray Analysis"[Mesh] OR "Mass Spectrometry"[Mesh])) AND ((validation OR validity OR validated OR "cross validation" "cross validated" OR "clinical utility\*" OR accuracy OR robustness OR reliability\* OR sensitivity OR specificity OR benchmark\* OR bias OR "cross study" OR "cross studies")) AND ("2000/01/01"[Date - Entry]: "2021/07/20"[Date - Entry])) Filters: English, French, Italian, Spanish

### 2) Embase Query

#25: #24 AND [embase]/lim NOT [medline]/lim  
#24: #23 AND [2000-2021]/py  
#23: #20 AND #21 AND ([english]/lim OR [french]/lim OR [italian]/lim OR [spanish]/lim)  
#22: #20 AND #21  
#21: omic\*:ti,ab OR 'machine learning':ti,ab OR 'personalized medicine':ti,ab OR 'personalised medicine':ti,ab  
#20: #4 AND #10 AND #16 AND #19  
#19: #17 OR #18  
#18: validation:ti,ab OR validity:ti,ab OR validated:ti,ab OR 'cross validation':ti,ab OR 'cross validated':ti,ab OR test\*:ti,ab OR 'clinical utility\*':ti,ab OR accuracy:ti,ab OR robustness:ti,ab OR reliability\*:ti,ab OR sensitivity:ti,ab OR specificity:ti,ab OR benchmark\*:ti,ab OR bias:ti,ab OR 'cross study:ti,ab' OR 'cross studies':ti,ab  
#17: 'validation study'/exp OR 'reliability'/exp OR 'sensitivity and specificity'/exp OR 'benchmarking'/exp  
#16: #14 OR #15  
#15: omic\*:ti,ab OR 'omic based':ti,ab OR 'multi omic\*':ti,ab OR genomic\*:ti,ab OR transcriptomic\*:ti,ab OR proteomic\*:ti,ab OR metabolomic\*:ti,ab OR lipidomic\*:ti,ab OR epigenomic\*:ti,ab OR microarray:ti,ab OR 'rna seq':ti,ab OR 'mass spectrometr\*':ti,ab  
#14: #11 OR #12 OR #13  
#13: 'mass spectrometry'/exp  
#12: 'microarray analysis'/exp  
#11: 'omics'/exp OR 'genomics'/exp OR 'epigenetics'/exp  
#10: #5 OR #6 OR #7 OR #8 OR #9  
#9: 'individualized medicine':ti,ab OR 'individualised medicine':ti,ab OR 'individualized therapy':ti,ab OR 'individualised therapy':ti,ab  
#8: 'personalised medicine':ti,ab  
#7: 'personalized medicine':ti,ab  
#6: 'stratified medicine':ti,ab OR cluster\*:ti,ab OR 'sub group\*':ti,ab OR subgroup\*:ti,ab OR biomarker\*:ti,ab OR diagnos\*:ti,ab OR prognos\*:ti,ab OR 'precision medicine':ti,ab  
#5: 'biological marker'/exp OR 'personalized medicine'/exp  
#4: #1 OR #2 OR #3  
#3: 'machine learning'/exp  
#2: 'statistical learning'/exp

#1: 'machine learning':ti,ab OR 'statistical learning':ti,ab OR 'supervised learning':ti,ab OR 'unsupervised learning':ti,ab

### 3) Web of Science Query

(((((#1) AND #1) AND #2) AND #3) AND #4) AND #5

5: (ALL=((validation OR validity OR validated OR "cross validation" "cross validated" OR "clinical utility\*" OR accuracy OR robustness OR reliability\* OR sensitivity OR specificity OR benchmark\*

OR bias OR "cross study" OR "cross studies"))) ) AND ALL=((omic\* OR "machine learning" OR

"personalized medicine" OR "personalised Medicine")) )

4: ALL=((validation OR validity OR validated OR "cross validation" "cross validated" OR "clinical utility\*" OR accuracy OR robustness OR reliability\* OR sensitivity OR specificity OR benchmark\*

OR bias OR "cross study" OR "cross studies"))) )

3: ALL=(TOPIC: ((Omic\* OR "omic based" OR "multi omic\*" OR genomic\* OR transcriptomic\* OR proteomic\* OR metabolomic\* OR lipidomic\* OR epigenomic\* OR microarray OR "RNA seq"

OR "mass spectrometr\*")) )

2: (ALL=(TOPIC: ("Machine learning" OR "statistical learning" OR "supervised learning" OR "unsupervised learning"))) ) AND ALL=(TOPIC: ("stratified medicine" OR cluster\* OR "sub group\*" OR Subgroup\* OR biomarker\* OR diagnos\* OR prognos\* OR "precision medicine" OR

"personalized medicine" OR "personalised medicine" OR "individualized Medicine" OR "individualised Medicine" OR "individualized therapy" OR "individualised therapy")) )

1: ALL=(TOPIC: ("Machine learning" OR "statistical learning" OR "supervised learning" OR "unsupervised learning"))) )
